# Supplementary material for: Measuring prostate-specific quality of life in prostate cancer patients scheduled for radiotherapy or radical prostatectomy and reference men in Germany and Canada using the Patient Oriented Prostate Utility Scale-Psychometric (PORPUS-P)
Source: BMC Cancer. 2009 Aug 23;9:295. doi: 10.1186/1471-2407-9-295 (PMC2739225; doi:10.1186/1471-2407-9-295)
Supplement: Additional file 1 — German Version of PORPUS-P. German version of the questionnaire "PORPUS"). [file 1471-2407-9-295-S1.pdf]

## Patient Oriented Prostate Cancer Utility Scale

### (PORPUS) – Deutsche Version 1.1

|                                                                                                                                                                                                                                                     |                          |                                                                                                                                                                    |
|-----------------------------------------------------------------------------------------------------------------------------------------------------------------------------------------------------------------------------------------------------|--------------------------|--------------------------------------------------------------------------------------------------------------------------------------------------------------------|
| <b>I. Schmerzen und störende körperliche Empfindungen</b><br><i>(wie z. B. Hitzewallungen, schmerzhaftes Anschwellen der Brust, Übelkeit)</i><br>Bitte kreuzen Sie die Aussage an, die in den letzten <u>zwei Wochen</u> am ehesten auf Sie zutraf. |                          |                                                                                                                                                                    |
| 1                                                                                                                                                                                                                                                   | <input type="checkbox"/> | Ich habe keine Schmerzen oder störende körperliche Empfindungen.                                                                                                   |
| 2                                                                                                                                                                                                                                                   | <input type="checkbox"/> | Ich habe geringe Schmerzen oder störende körperliche Empfindungen, die mich aber nicht behindern (bei meiner Arbeit, sozialen oder sexuellen Aktivitäten, Schlaf). |
| 3                                                                                                                                                                                                                                                   | <input type="checkbox"/> | Ich habe mäßige Schmerzen oder störende körperliche Empfindungen, die wenige meiner Aktivitäten beeinflussen.                                                      |
| 4                                                                                                                                                                                                                                                   | <input type="checkbox"/> | Ich habe mäßige Schmerzen oder störende körperliche Empfindungen, die einige meiner Aktivitäten beeinflussen.                                                      |
| 5                                                                                                                                                                                                                                                   | <input type="checkbox"/> | Ich habe starke Schmerzen oder störende körperliche Empfindungen, die viele meiner Aktivitäten beeinflussen.                                                       |
| <b>II. Energie</b><br>Bitte kreuzen Sie die Aussage an, die in den letzten <u>zwei Wochen</u> am ehesten auf Sie zutraf.                                                                                                                            |                          |                                                                                                                                                                    |
| 1                                                                                                                                                                                                                                                   | <input type="checkbox"/> | Ich bin voller Energie und Schwung.                                                                                                                                |
| 2                                                                                                                                                                                                                                                   | <input type="checkbox"/> | Ich bin eher Energie geladen, habe keine Einschränkungen bei Aktivitäten (wie z. B. bei Arbeit, sozialen oder sexuellen Aktivitäten, Schlaf).                      |
| 3                                                                                                                                                                                                                                                   | <input type="checkbox"/> | Ich verspüre eine mäßige Beeinträchtigung von Energie und Schwung, die einige meiner Aktivitäten beeinflussen.                                                     |
| 4                                                                                                                                                                                                                                                   | <input type="checkbox"/> | Ich habe generell wenig Energie und Schwung, was einige meiner Aktivitäten beeinträchtigt.                                                                         |
| 5                                                                                                                                                                                                                                                   | <input type="checkbox"/> | Ich habe keine Energie und keinen Schwung, fühle mich erschöpft und viele meiner Aktivitäten sind beeinträchtigt.                                                  |
| <b>III. Unterstützung von Familie und Freunden</b><br>Bitte kreuzen Sie die Aussage an, die in den letzten <u>zwei Wochen</u> am ehesten auf Sie zutraf.                                                                                            |                          |                                                                                                                                                                    |
| 1                                                                                                                                                                                                                                                   | <input type="checkbox"/> | Ich fühle mich die meiste Zeit unterstützt von meinem Partner, der Familie und Freunden.                                                                           |
| 2                                                                                                                                                                                                                                                   | <input type="checkbox"/> | Ich fühle mich einen großen Teil der Zeit unterstützt von meinem Partner, der Familie und Freunden.                                                                |
| 3                                                                                                                                                                                                                                                   | <input type="checkbox"/> | Ich fühle mich gelegentlich unterstützt von meinem Partner, der Familie und Freunden.                                                                              |
| 4                                                                                                                                                                                                                                                   | <input type="checkbox"/> | Ich fühle mich kaum unterstützt von meinem Partner, der Familie und Freunden.                                                                                      |

#### IV. Kommunikation mit dem Arzt

*(Behandelnder Arzt, kann ein Spezialist oder auch der Hausarzt sein.)*

Bitte kreuzen Sie die Aussage an, die während der letzten zwei Behandlungen am ehesten auf Sie zutraf.

|   |                          |                                                                                                                                                         |
|---|--------------------------|---------------------------------------------------------------------------------------------------------------------------------------------------------|
| 1 | <input type="checkbox"/> | Ich bin jederzeit in der Lage, meine Bedürfnisse meinem Arzt gegenüber auszudrücken und bekomme alle Informationen und Ratschläge, die ich brauche.     |
| 2 | <input type="checkbox"/> | Meistens bin ich in der Lage, meine Bedürfnisse meinem Arzt gegenüber auszudrücken, um alle Informationen und Ratschläge, die ich brauche, zu bekommen. |
| 3 | <input type="checkbox"/> | Manchmal bin ich in der Lage, meine Bedürfnisse meinem Arzt gegenüber auszudrücken, um alle Informationen und Ratschläge, die ich brauche, zu bekommen. |
| 4 | <input type="checkbox"/> | Ich bin selten in der Lage, meine Bedürfnisse meinem Arzt gegenüber auszudrücken, um alle Informationen und Ratschläge, die ich brauche, zu bekommen.   |

#### V. Emotionales Wohlbefinden

Bitte kreuzen Sie die Aussage an, die in den letzten zwei Wochen am ehesten auf Sie zutraf.

|   |                          |                                                                          |
|---|--------------------------|--------------------------------------------------------------------------|
| 1 | <input type="checkbox"/> | Ich bin überwiegend glücklich, nicht bedrückt, traurig oder unzufrieden. |
| 2 | <input type="checkbox"/> | Ich bin ein wenig bedrückt, traurig oder unzufrieden.                    |
| 3 | <input type="checkbox"/> | Ich bin mäßig bedrückt, traurig oder unzufrieden.                        |
| 4 | <input type="checkbox"/> | Ich bin sehr bedrückt, traurig oder unzufrieden.                         |

#### VI. Häufiges Wasserlassen / nicht unterdrückbarer Harndrang

*(Häufiges Wasserlassen während des Tages oder der Nacht, Harndrang (=Schwierigkeiten das Wasserlassen hinaus zu zögern; Unfähigkeit de Urin länger zu halten).)*

Bitte kreuzen Sie die Aussage an, die in den letzten zwei Wochen am ehesten auf Sie zutraf.

|   |                          |                                                                                                                       |
|---|--------------------------|-----------------------------------------------------------------------------------------------------------------------|
| 1 | <input type="checkbox"/> | Ich habe keine Beschwerden.                                                                                           |
| 2 | <input type="checkbox"/> | Ich habe geringe Beschwerden, ich muss nicht im Voraus planen.                                                        |
| 3 | <input type="checkbox"/> | Ich habe einige Beschwerden, diese beeinträchtigen den Schlaf und andere Aktivitäten, ich muss weit im Voraus planen. |
| 4 | <input type="checkbox"/> | Ich habe starke Beschwerden, ich muss mich meistens in der Nähe der Toilette aufhalten.                               |
| 5 | <input type="checkbox"/> | Ich habe sehr starke Beschwerden, ich muss mich ständig in der Nähe der Toilette aufhalten.                           |

## VII. Kontinenz

*(Unfreiwilliger Harnabgang, Unvermögen, den Harn zurückzuhalten.)*

Bitte kreuzen Sie die Aussage an, die in den letzten zwei Wochen am ehesten auf Sie zutraf.

|   |                          |                                                                                                                                             |
|---|--------------------------|---------------------------------------------------------------------------------------------------------------------------------------------|
| 1 | <input type="checkbox"/> | Ich habe niemals, unter keinen Umständen unfreiwilligen Harnabgang.                                                                         |
| 2 | <input type="checkbox"/> | Ich habe selten unfreiwilligen Harnabgang, was aber meine Arbeit, soziale und sexuelle Aktivitäten oder meinen Schlaf nicht beeinträchtigt. |
| 3 | <input type="checkbox"/> | Ich habe gelegentlich unfreiwilligen Harnabgang, das beeinträchtigt wenige meiner Aktivitäten.                                              |
| 4 | <input type="checkbox"/> | Ich habe mäßig unfreiwilligen Harnabgang, das beeinträchtigt einige meiner Aktivitäten.                                                     |
| 5 | <input type="checkbox"/> | Ich habe meistens unfreiwilligen Harnabgang, das beeinträchtigt viele meiner Aktivitäten.                                                   |
| 6 | <input type="checkbox"/> | Ich benötige eine Klemme, einen Katheter oder einen Urinbeutel.                                                                             |

## VIII. Sexuelle Funktion

*(Probleme eine Erektion zu erreichen und zu halten; mit oder ohne Hilfsmittel wie beispielsweise Injektion oder Prothese.)*

Bitte kreuzen Sie die Aussage an, die in den letzten zwei Wochen am ehesten auf Sie zutraf.

|   |                          |                                                                                                               |
|---|--------------------------|---------------------------------------------------------------------------------------------------------------|
| 1 | <input type="checkbox"/> | Ich habe vollständige Erektionen, die ausreichend steif für den Geschlechtsverkehr sind.                      |
| 2 | <input type="checkbox"/> | Ich habe Erektionen, die ausreichend steif für den Geschlechtsverkehr sind, diese jedoch mit Einschränkungen. |
| 3 | <input type="checkbox"/> | Ich habe Erektionen, die ausreichend steif sind für Masturbation oder Vorspiele.                              |
| 4 | <input type="checkbox"/> | Ich habe Erektionen, die nicht ausreichend steif für irgendeine sexuelle Aktivität sind.                      |
| 5 | <input type="checkbox"/> | Ich habe keine Erektionen.                                                                                    |

## IX. Sexuelles Verlangen und Interesse

Bitte kreuzen Sie die Aussage an, die in den letzten zwei Wochen am ehesten auf Sie zutraf.

|   |                          |                                                                        |
|---|--------------------------|------------------------------------------------------------------------|
| 1 | <input type="checkbox"/> | Mein sexuelles Verlangen und Interesse sind normal für mich.           |
| 2 | <input type="checkbox"/> | Mein sexuelles Verlangen und Interesse haben geringfügig nachgelassen. |
| 3 | <input type="checkbox"/> | Mein sexuelles Verlangen und Interesse haben mäßig nachgelassen.       |
| 4 | <input type="checkbox"/> | Mein sexuelles Verlangen und Interesse haben wesentlich nachgelassen.  |
| 5 | <input type="checkbox"/> | Ich verspüre kein sexuelles Verlangen oder Lust.                       |

**X. Verdauungsbeschwerden**

*(Verstopfung, Durchfall, Darmbeschwerden wie Schmerzen, Brennen oder Irritation)*

Bitte kreuzen Sie die Aussage an, die in den letzten zwei Wochen am ehesten auf Sie zutraf.

|   |                          |                                                                          |
|---|--------------------------|--------------------------------------------------------------------------|
| 1 | <input type="checkbox"/> | Ich habe keinen Durchfall, keine Darmbeschwerden oder Verstopfung.       |
| 2 | <input type="checkbox"/> | Ich habe gelegentlich Durchfall, Darmbeschwerden oder Verstopfung.       |
| 3 | <input type="checkbox"/> | Ich habe regelmäßig Durchfall, Darmbeschwerden oder Verstopfung.         |
| 4 | <input type="checkbox"/> | Ich habe ständig/fast immer Durchfall, Darmbeschwerden oder Verstopfung. |
